# Supplementary material for: Synthesis and electrochemical properties of Mn3O4nanocrystals with controlled morphologies grown from compact ion layers
Source: Royal Society of Chemistry journal article supplement (doi:10.1039/c5ra28110e), 2016-01-01
Supplement: c5ra28110e1.pdf [file c5ra28110e1.pdf]

# Synthesis and Electrochemical Properties of $\text{Mn}_3\text{O}_4$ Nanocrystals with Controlled Morphologies Grown from Compact Ion Layers

Hae Woong Park<sup>a</sup>, Ho Jun Lee<sup>a</sup>, Sun-min Park<sup>a</sup> and Kwang Chul Roh<sup>\*a</sup>

<sup>a</sup>Energy & Environmental Division, Korea Institute of Ceramic Engineering and Technology,  
101, Soho-ro, Jinju-si, Gyeongsangnam-do, 660-031, Republic of Korea.

\* Corresponding author: Kwang Chul Roh ([rkc@kicet.re.kr](mailto:rkc@kicet.re.kr))

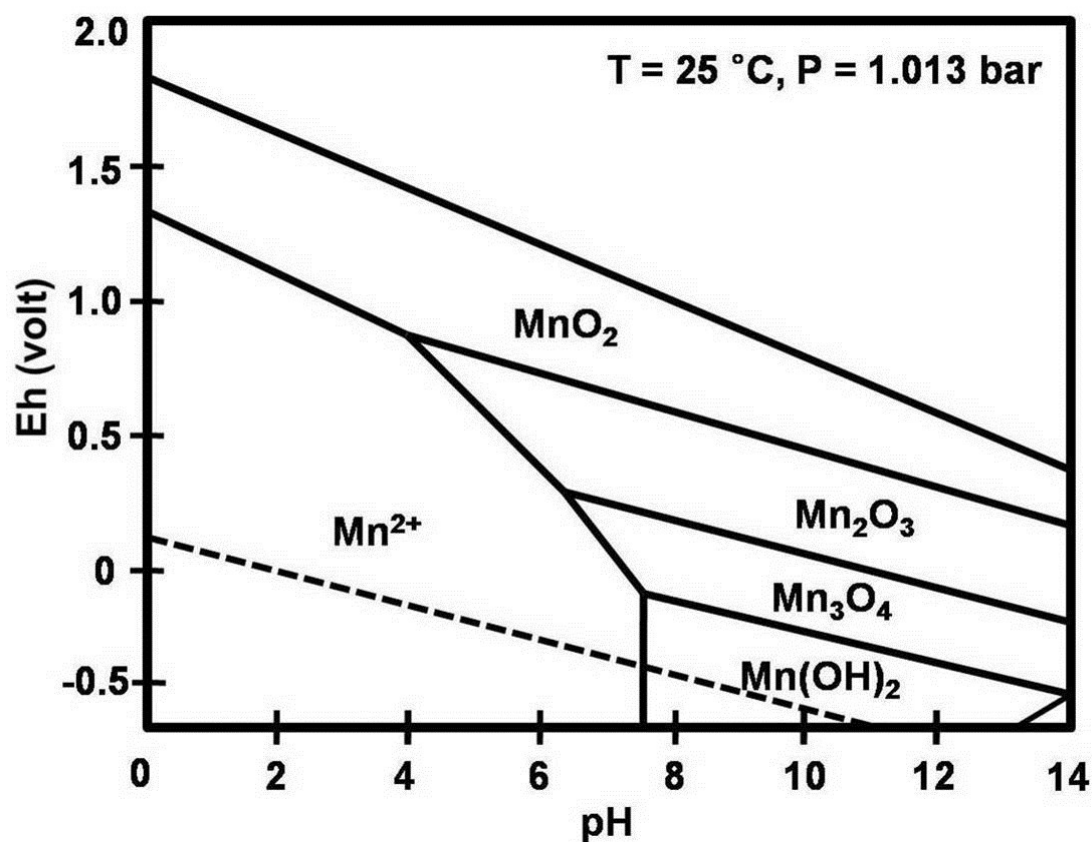

Fig. S1. The Pourbaix diagram showing the potential-pH equilibrium for manganese-water system.

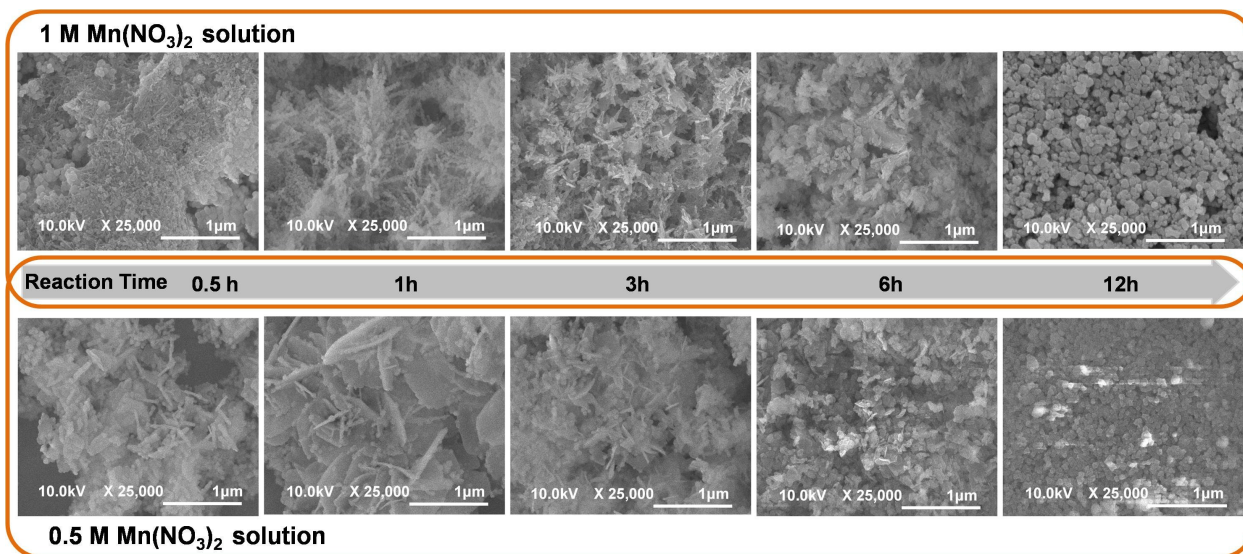

**Fig. S2.** SEM images of the morphological evolution of the different-shaped  $\text{Mn}_3\text{O}_4$  nanocrystals; (a, b, c, d, e) 1 M  $\text{Mn}(\text{NO}_3)_2$  solution and (f, g, h, i, j) 0.5 M  $\text{Mn}(\text{NO}_3)_2$  solution.

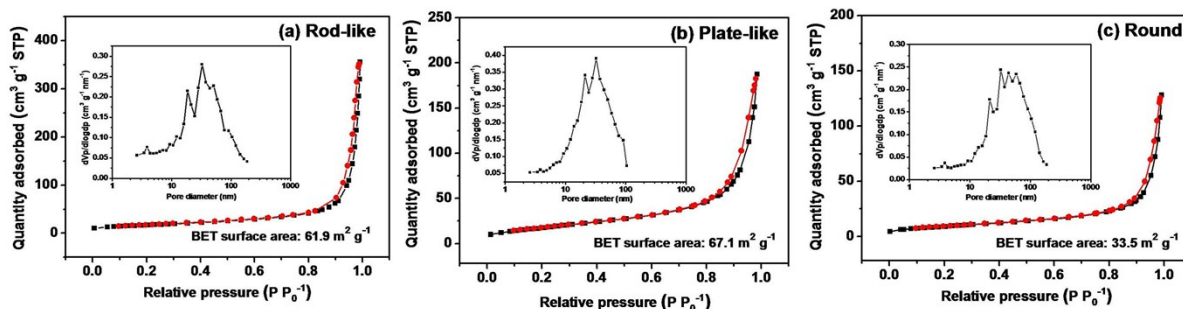

**Fig. S3.**  $\text{N}_2$  adsorption-desorption isotherms of  $\text{Mn}_3\text{O}_4$  samples and the insets in (a-c) are the corresponding pore size distribution curves.

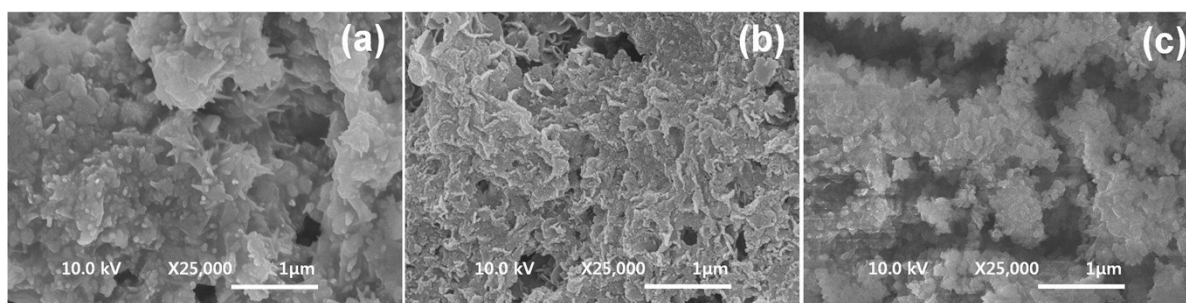

**Fig. S4.** SEMs of the  $\text{Mn}_3\text{O}_4$  electrode after the charging-discharging (after 1000 cycles) experiments. (a) rod-like, (b) plate-like and (c) round  $\text{Mn}_3\text{O}_4$ .
